# Supplementary material for: Antimicrobial activity and mechanism of peptide CM4 againstPseudomonas aeruginosa
Source: Royal Society of Chemistry journal article supplement (doi:10.1039/d0fo01031f), 2020-01-01
Supplement: d0fo01031f1.pdf [file d0fo01031f1.pdf]

**Table S1.** The sequence of peptide

| Peptide        | Sequence                                                    |
|----------------|-------------------------------------------------------------|
| CM4            | <i>RWKIFKKIEKVGQNIRDGIVKAGPAVAVVGQAATI-COOH</i>             |
| P1 (CM4-MA II) | <i>RWKIFKKIGIGKFLHSAKKF</i>                                 |
| P2 (CM4-ME)    | <i>RWKIFKKIGAVLKVL</i>                                      |
| P3 (AcNH-CM4)  | <i>AcNH-RWKIFKKIEKVGQNIRDGIVKAGPAVAVVGQAATI</i>             |
| P4 (KKKKKKCM4) | <i>KKKKKKRWKIFKKIEKVGQNIRDGIVKAGPAVAVVGQAATI</i>            |
| CM4N           | <i>RWKIFKKIEKVGQNIRDGIVKAGPAVAVVGQAATI-CONH<sub>2</sub></i> |

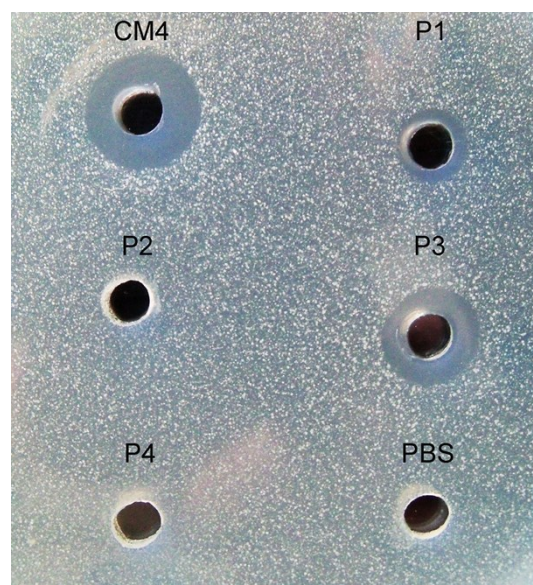

**Figure S1.** Inhibition zone assay of the bioactivity of ABP-CM4 (16  $\mu$ M), P1 (32  $\mu$ M), P2, (32  $\mu$ M), P3 (32  $\mu$ M) and P4 (32  $\mu$ M) in comparison to the control treatment with PBS.

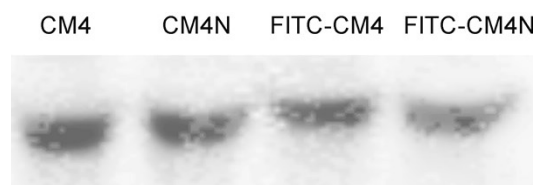

**Figure S2.** Tricine/SDS–PAGE analysis of ABPs and FITC-ABPs.

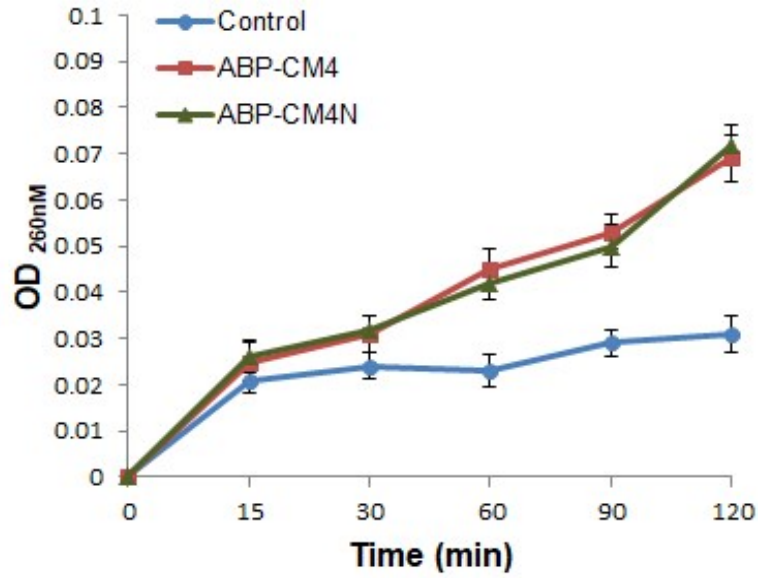

**Figure S3.** The analysis of total nucleotide leakage caused by ABPs by ultraviolet absorption. The peptides concentration of ABP-CM4 was 16  $\mu$ M. The peptides concentration of ABP-CM4N was 8  $\mu$ M. Data points present mean  $\pm$  SE (n=3) of three independent experiments.

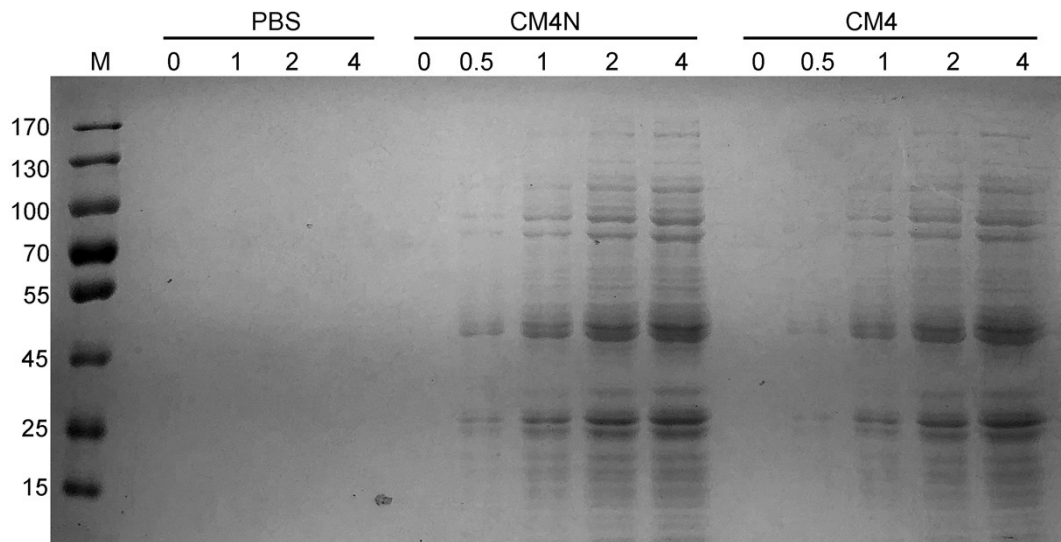

**Figure S4.** The analysis of total protein leakage caused by ABPs by SDS-PAGE. The peptides concentration of ABP-CM4 was 16  $\mu$ M. The peptides concentration of ABP-CM4N was 8  $\mu$ M.

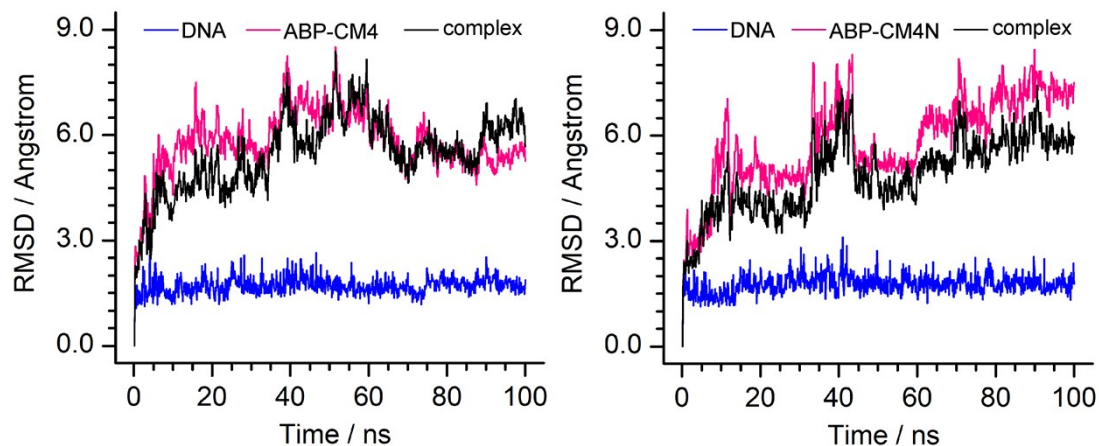

**Figure S5.** RMSDs of the ABP-CM4–DNA and ABP-CM4N–DNA binding complexes.

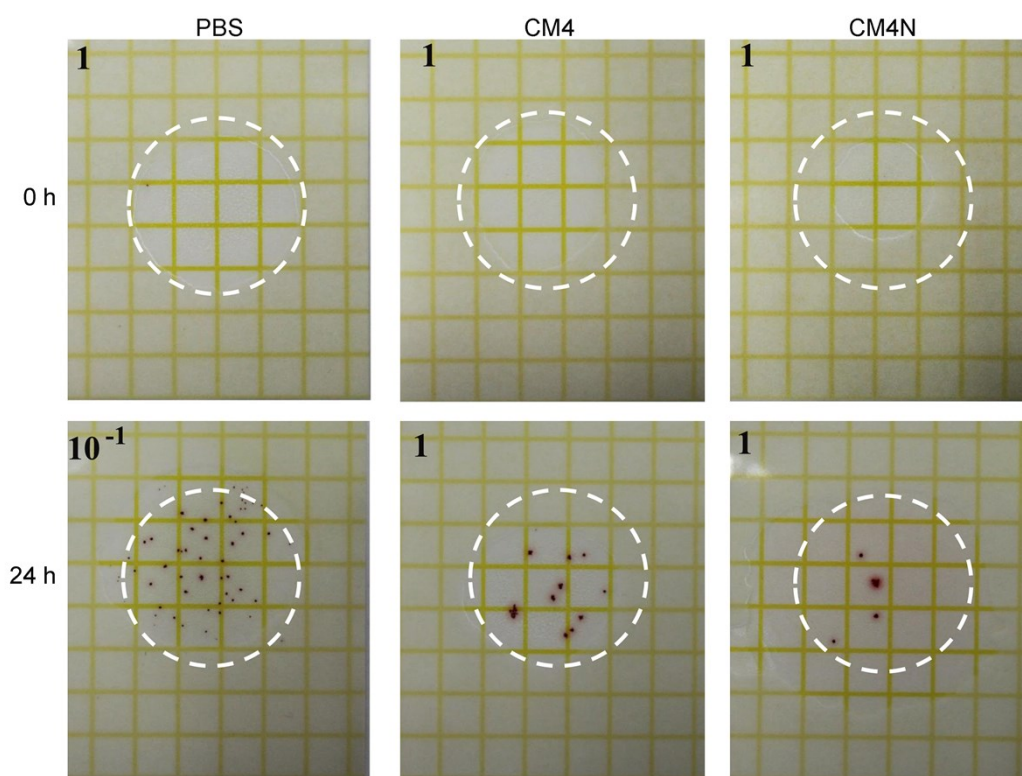

**Figure S6.** Inhibition of bacteria in meat samples of porks. The peptides concentration of ABP-CM4 or ABP-CM4N was 16  $\mu$ M. Each value is expressed as the mean  $\pm$  SE (n=3) of three independent experiments. The average number of positive colonies treated by FITC-CM4 or FITC-CM4N was  $26 \pm 2$  CFU/mL and 14

$\pm 2$  CFU/mL ( $p < 0.05$ ). The average number of colonies treated with PBS was  $940 \pm 9$  CFU/mL.

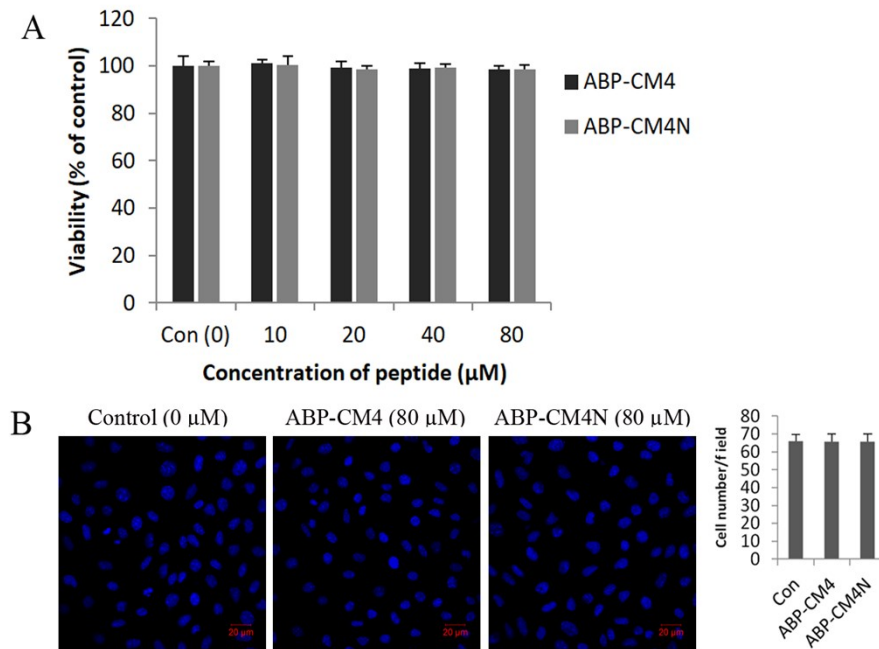

**Figure S7.** Cytotoxicity assay of ABP-CM4 and ABP-CM4N to HEK-293 cells. Cell viability was measured following a standard MTT assay procedure (A). The mean absorbance of the control values representing 100% cell viability, and the mean absorbance of treated cells was related to control values to determine sensitivity. Data points present mean  $\pm$  SE ( $n=3$ ) of three independent experiments. There was no difference in the cell viability compared with the control group. The cell number treated with high concentration peptides (80  $\mu$ M) was observed by fluorescence microscope (B). The nucleus was stained by DAPI. Data points present mean  $\pm$  SE ( $n=10$ ) of ten independent visual field. There was no difference in the number of cells treated with 80  $\mu$ M peptides compared with the control group.
